# Supplementary material for: N-Substituted poly(3,6-dithienylcarbazole) derivatives: a new class of redox-active electrode materials for high-performance flexible solid-state pseudocapacitors
Source: Royal Society of Chemistry journal article supplement (doi:10.1039/c6ta08978j), 2016-11-18
Supplement: c6ta08978j1.pdf [file c6ta08978j1.pdf]

## Electronic supplementary informations

### ***N*-Substituted poly(3,6-dithienylcarbazole) derivatives: A new class redox-active electrode materials for high-performance flexible solid-state pseudocapacitors**

Deniz Yiğit <sup>a,\*</sup> and Mustafa Güllü <sup>a,\*</sup>

#### Contents

- Synthesis of tert-butyl 2-(3,6-dibromo-9*H*-carbazol-9-yl)acetate (2)
- General procedure for synthesis of 3,6-dithienylcarbazole derivatives
- *Tert-butyl 2-(3,6-di(thien-2-yl)-9H-carbazol-9-yl)acetate* (TTBCbz)
- *Tert-butyl 2-(3,6-bis(2,3-dihydrothieno[3,4-*b*][1,4]dioxin-5-yl)-9H-carbazol-9-yl)acetate* (ETBCbz)
- Fig. S1 Two green LEDs powered by (a) Cell I and (b) Cell II flexible solid-state supercapacitor devices.
- Fig. S2 <sup>1</sup>H NMR spectrum of tert-butyl 2-(3,6-dibromo-9*H*-carbazol-9-yl)acetate (2)
- Fig. S3 Mass spectrum of tert-butyl 2-(3,6-dibromo-9*H*-carbazol-9-yl)acetate (2)
- Fig. S4 <sup>1</sup>H NMR spectrum of tert-butyl 2-(3,6-di(thien-2-yl)-9*H*-carbazol-9-yl)acetate) (TTBCbz)
- Fig. S5 <sup>13</sup>C NMR spectrum of tert-butyl 2-(3,6-di(thien-2-yl)-9*H*-carbazol-9-yl)acetate) (TTBCbz)
- Fig. S6 Mass spectrum of tert-butyl 2-(3,6-di(thien-2-yl)-9*H*-carbazol-9-yl)acetate) (TTBCbz)
- Fig. S7 <sup>1</sup>H NMR spectrum of tert-butyl 2-(3,6-bis(2,3-dihydrothieno[3,4-*b*][1,4]dioxin-5-yl)-9*H*-carbazol-9-yl)acetate (ETBCbz)
- Fig. S8 <sup>13</sup>C NMR spectrum of tert-butyl 2-(3,6-bis(2,3-dihydrothieno[3,4-*b*][1,4]dioxin-5-yl)-9*H*-carbazol-9-yl)acetate (ETBCbz)

- Fig. S9 Mass spectrum of tert-butyl 2-(3,6-bis(2,3-dihydrothieno[3,4-b][1,4]dioxin-5-yl)-9H-carbazol-9-yl)acetate (ETBCbz)

## Synthesis of tert-butyl 2-(3,6-dibromo-9H-carbazol-9-yl)acetate (2)

3,6-Dibromo-9H-carbazole (1) (0.65 g, 2 mmol), tert-butyl bromoacetate (0.47 g, 2.4 mmol, 1.2 eqv.) and anhydrous cesium carbonate ( $\text{Cs}_2\text{CO}_3$ , 1.29 g, 4 mmol, 2eqv.) were placed in a glass microwave reaction vessel (30 mL) and a few drops of dry DMF was added. The eventual heterogeneous mixture was heated at 80°C under 100 W single-mode microwave irradiation for 8 min. After cooling room temperature, the slurry mixture was poured out into ice-water (50 mL) and vigorously stirred for 15 min. The aqueous phase was extracted with chloroform (3 x 20 mL), washed with water and brine and dried over anhydrous  $\text{Na}_2\text{SO}_4$ . The solvent was removed on a rotary evaporator under reduced pressure. The crude product was purified by flash chromatography using dichloromethane as eluent ( $R_f = 0.75$ ) afforded (1.78 mmol, 0.78 g, 89%, mp 133-137°C) as a white solid. FTIR (KBr pellet)  $\nu_{\text{max}}/\text{cm}^{-1}$ : 3078 (aromatic C-H stretching), 2980, 2911 (aliphatic C-H stretching), 1736 (ester C=O stretching), 1596, 1579 (aromatic C=C stretching), 1473, 1349 (aliphatic C-H bending), 1209 (-C-O- stretching).  $^1\text{H}$  NMR  $\delta\text{H}$  (400 MHz;  $\text{CDCl}_3$ ;  $\text{Me}_4\text{Si}$ ) 1.38 (s, 9H,  $-\text{CH}_3$ ), 4.8 (s, 2H,  $-\text{CH}_2-$ ), 7.21 (dd,  $J=8.7$  Hz, 2H, Cbz-H), 7.55-7.58 (dd,  $J=6.5$  Hz and  $J=2$  Hz, 2H, Cbz-H), 8.14 (d,  $J=1.6$  Hz, 2H, Cbz-H). MS (EI)  $m/z$  438.9 ( $\text{M}^+$ , 2%,  $\text{C}_{18}\text{H}_{17}\text{Br}_2\text{NO}_2$ , 439.1), 411 (50%), 383 (5%), 338 (100%), 257 (25%), 231 (3%), 207.1 (2%), 178.1 (15%), 151.1 (20%), 125.1 (3%), 89 (10%), 75.2 (10%).

## General procedure for synthesis of 3,6-dithienylcarbazole derivatives

The palladium-catalyzed Stille cross-coupling reaction was employed for synthesis of 3,6-dithienylcarbazole derivatives. In a dried 100 mL two-necked round-bottomed flask fitted with a reflux condenser and argon (Ar) inlet, tert-butyl 2-(3,6-dibromo-9H-carbazol-9-yl)acetate (2) (0.6 g, 1.36 mmol) and tetrakis(triphenylphosphine) palladium (0) ( $\text{Pd}(\text{PPh}_3)_4$ , 0.04 g, 0.034 mmol, 0.025 eqv.) were dissolved in dry toluene (20 mL). The light yellow solution was purged with Ar and intensely stirred at room temperature for 15 min. Then, 2-(tributylstannyl)thiophene (1.26 g, 3.4 mmol, 2.5 eqv.) or tributyl(2,3-dihydrothieno[3,4-b][1,4]dioxin-5-yl)stannane (1.46 g, 3.4 mmol, 2.5 eqv.) was added via a syringe and the reaction suspension was heated at 110 °C

for 18 h under Ar atmosphere. The dark yellow reaction mixture was cooled to room temperature and toluene was removed on a rotary evaporator under reduced pressure. The oily crude product was subjected to column chromatography using SiO<sub>2</sub> as solid phase and hexane/ethyl acetate mixture as eluent to afford a disered product. The chemical structure of pure monomer was identified by FTIR, <sup>1</sup>H NMR, <sup>13</sup>C NMR, mass spectrometry techniques and elemental analysis.

***Tert-butyl 2-(3,6-di(thien-2-yl)-9H-carbazol-9-yl)acetate (TTBCbz)***

This monomer was obtained via Stille cross-coupling reaction of tert-butyl 2-(3,6-dibromo-9H-carbazol-9-yl)acetate (2) and 2-(tributylstannyl)thiophene. The crude product was purified by column chromatography using hexane/ethyl acetate (8:1, v/v) as eluent ( $R_f = 0.75$ ) to afford a beige solid product (1.12 mmol, 0.5 g, 83%, mp 144-147°C). FTIR (KBr pellet)  $\nu_{\max}/\text{cm}^{-1}$ : 3108, 3057 (aromatic C-H stretching), 2981, 2925 (aliphatic C-H stretching), 1734 (ester C=O stretching), 1605, 1577 (aromatic C=C stretching), 1485, 1346 (aliphatic C-H bending), 1220 (-C-O- stretching). <sup>1</sup>H NMR  $\delta$ H (400 MHz; CDCl<sub>3</sub>; Me<sub>4</sub>Si) 1.41 (s, 9H, -CH<sub>3</sub>), 4.89 (s, 2H, -CH<sub>2</sub>), 7.1-7.12 (dd,  $J=8.2$  Hz and  $J=3.2$  Hz, 2H, Th-H), 7.26-7.28 (dd,  $J=6$  Hz and  $J=1.2$  Hz, 2H, Th-H), 7.31-7.33 (dd,  $J=8.7$  Hz, 2H, Cbz-H), 7.35-7.36 (dd,  $J=4.4$  Hz and  $J=1.2$  Hz, 2H, Th-H), 7.72-7.75 (dd,  $J=6.5$  Hz and  $J=2$  Hz, 2H, Cbz-H), 8.33 (d,  $J=1.6$  Hz, 2H, Cbz-H). <sup>13</sup>C NMR  $\delta$ C (400 MHz; CDCl<sub>3</sub>; Me<sub>4</sub>Si) 27.9, 45.7, 82.8, 118.1, 122.2, 122.5, 123.5, 123.8, 124.8, 126.6, 128, 140.6, 145.4, 167.2. MS (EI)  $m/z$  445 (M<sup>+</sup>, 40%, C<sub>26</sub>H<sub>23</sub>NO<sub>2</sub>S<sub>2</sub>, 445.6), 417 (15%), 389 (90%), 344 (100%), 299 (5%), 262 (5%), 194 (20%), 172 (20%), 149 (3%), 83 (15%), 56 (20%). Elemental analysis Found: C, 69.76; H, 4.91; N, 3.29. Cald. for C<sub>26</sub>H<sub>23</sub>NO<sub>2</sub>S<sub>2</sub>: C, 70.08; H 5.20; N 3.14%.

***Tert-butyl 2-(3,6-bis(2,3-dihydrothieno[3,4-b][1,4]dioxin-5-yl)-9H-carbazol-9-yl)acetate (ETBCbz)***

This monomer was synthesized via Stille coupling reaction between tert-butyl 2-(3,6-dibromo-9H-carbazol-9-yl)acetate (2) and tributyl(2,3-dihydrothieno[3,4-b][1,4]dioxin-5-yl)stannane. The crude product was subjected to column

chromatography using hexane/ethyl acetate (6:1, v/v) as eluent ( $R_f = 0.55$ ). The pure product was obtained as a light brown solid (1.17 mmol, 0.65 g, 86%, mp 132-134°C). FTIR (KBr pellet)  $\nu_{\max}/\text{cm}^{-1}$ : 3110 (aromatic C-H stretching), 2978, 2851 (aliphatic C-H stretching), 1736 (ester C=O stretching), 1604, 1502 (aromatic C=C stretching), 1483, 1347 (aliphatic C-H bending), 1229 (-C-O- stretching).  $^1\text{H}$  NMR  $\delta\text{H}$  (400 MHz;  $\text{CDCl}_3$ ;  $\text{Me}_4\text{Si}$ ) 1.40 (s, 9H,  $-\text{CH}_3$ ), 4.22-4.38 (m, 8H, EDOT- $\text{CH}_2$ -) 4.88 (s, 2H,  $-\text{CH}_2$ ), 6.27 (s, 1H, EDOT-H), 6.29 (s, 1H, EDOT-H), 7.29-7.31 (dd,  $J = 8.7$  Hz, 2H, Cbz-H), 7.82-7.84 (dd,  $J = 6.5$  Hz and  $J = 2$  Hz, 2H, Cbz-H), 8.41 (d,  $J = 1.6$  Hz, 2H, Cbz-H).  $^{13}\text{C}$  NMR  $\delta\text{C}$  (400 MHz;  $\text{CDCl}_3$ ;  $\text{Me}_4\text{Si}$ ) 27.9, 45.7, 64.5, 64.7, 64.8, 64.9, 82.6, 96.4, 97.5, 108.5, 118.4, 123.5, 124.9, 139.9, 141.2, 167.2. MS (EI)  $m/z$ : 561 ( $\text{M}^+$ , 2%,  $\text{C}_{30}\text{H}_{27}\text{NO}_6\text{S}_2$ , 561.6), 501 (40%), 445 (100%), 400 (40%), 365 (20%), 346 (20%), 316 (15%), 262 (25%), 257 (15%), 222 (10%), 185 (25%), 151 (20%), 97 (10%), 57 (25%). Elemental analysis: anal. Found: C, 63.87; H, 4.58; N, 2.32. Cald. for  $\text{C}_{30}\text{H}_{27}\text{NO}_6\text{S}_2$ : C, 64.15; H, 4.85; N, 2.49%.

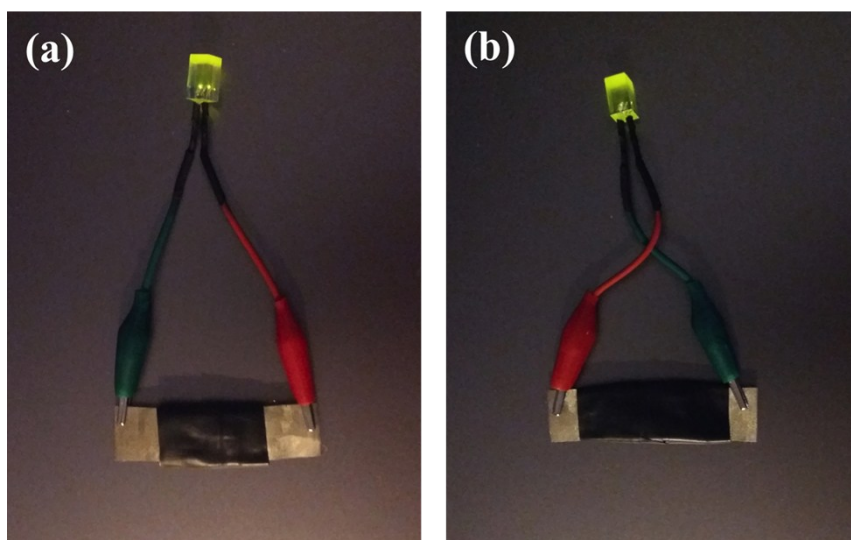

**Fig. S1** Two green LEDs powered by (a) Cell I and (b) Cell II flexible solid-state supercapacitor devices.

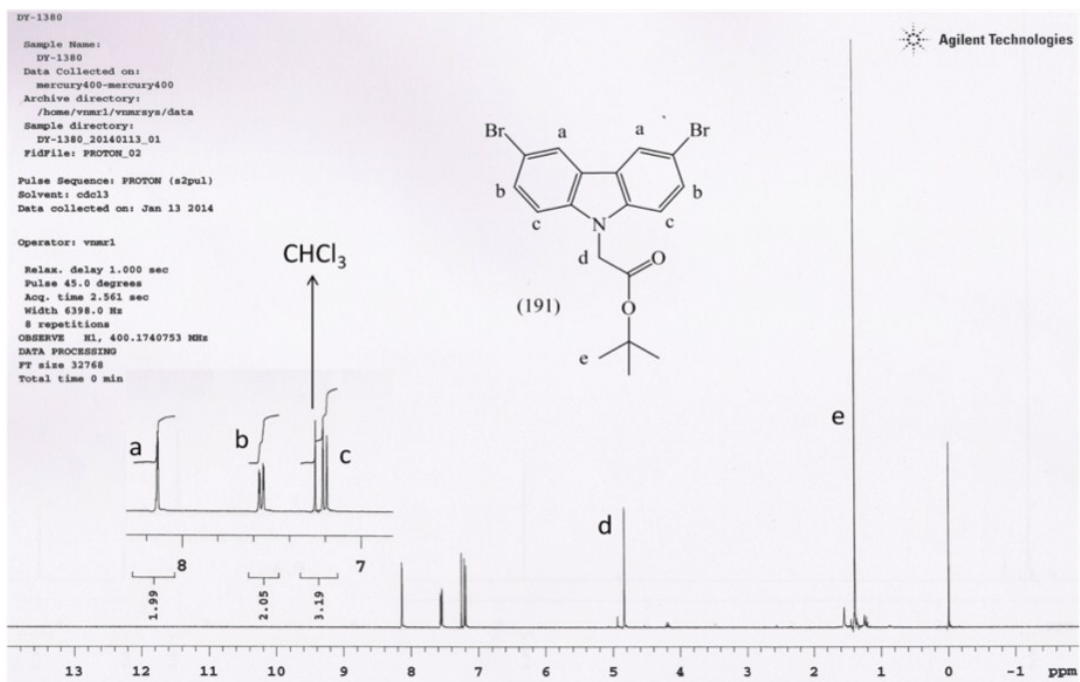

**Fig. S2** <sup>1</sup>H NMR spectrum of tert-butyl 2-(3,6-dibromo-9H-carbazol-9-yl)acetate (2)

File : C:\msdchem\1\DATA\MG-DY1380.D  
 Operator : MG  
 Acquired : 23 Nov 2013 14:32 using AcqMethod MGLuzun-modifiye.M  
 Instrument : Instrument #1  
 Sample Name: MG-DY1380  
 Misc Info :  
 Vial Number: 1

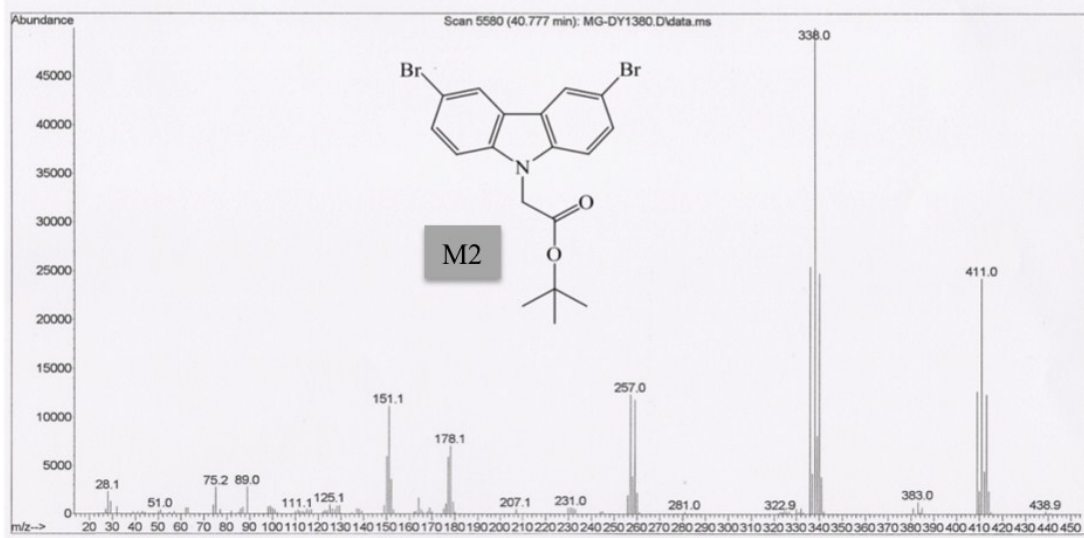

Fig. S3 Mass spectrum of tert-butyl 2-(3,6-dibromo-9H-carbazol-9-yl)acetate (2)

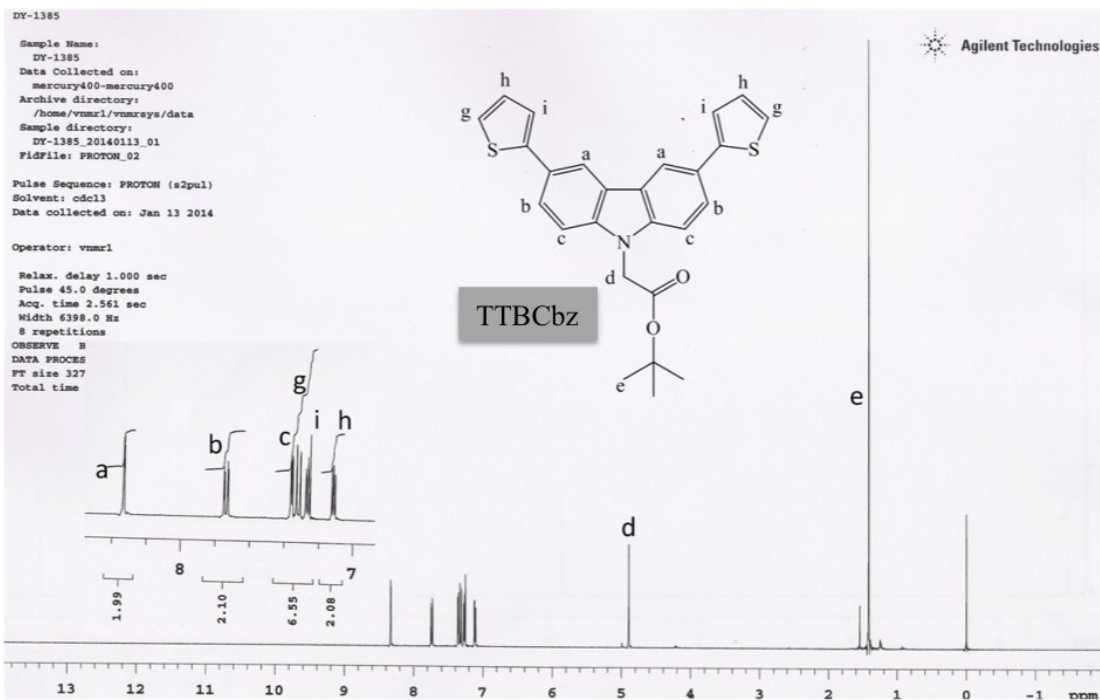

Fig. S4  $^1\text{H}$  NMR spectrum of tert-butyl 2-(3,6-di(thien-2-yl)-9H-carbazol-9-yl)acetate (TTBCbz)

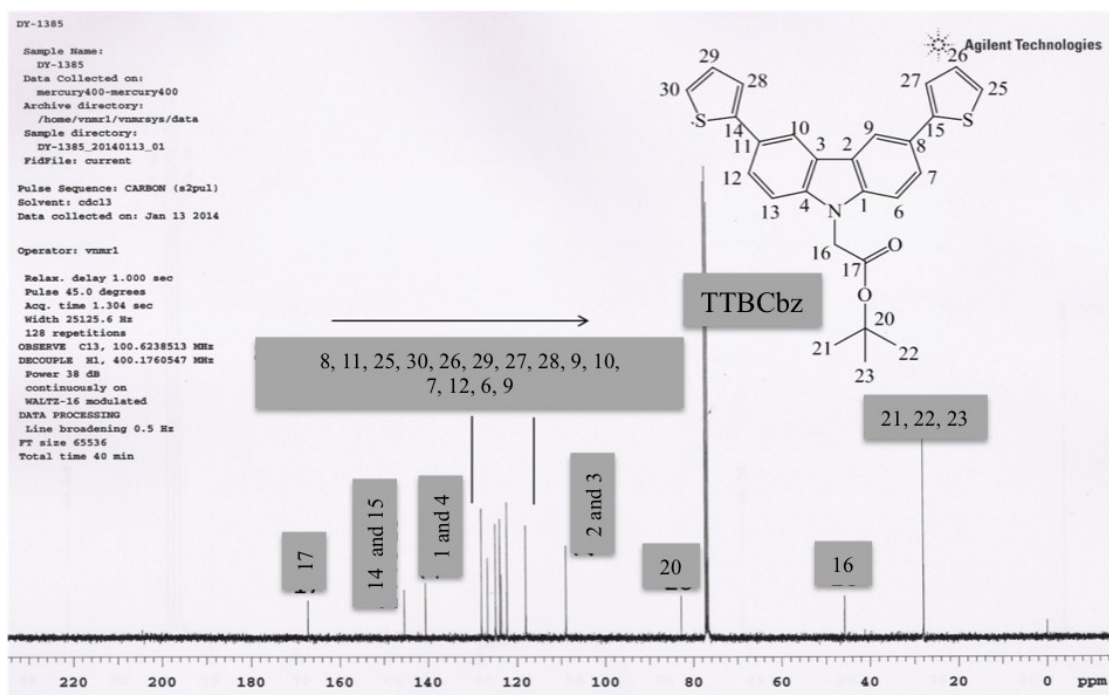

**Fig. S5**  $^{13}\text{C}$  NMR spectrum of tert-butyl 2-(3,6-di(thien-2-yl)-9H-carbazol-9-yl)acetate (TTBCbz)

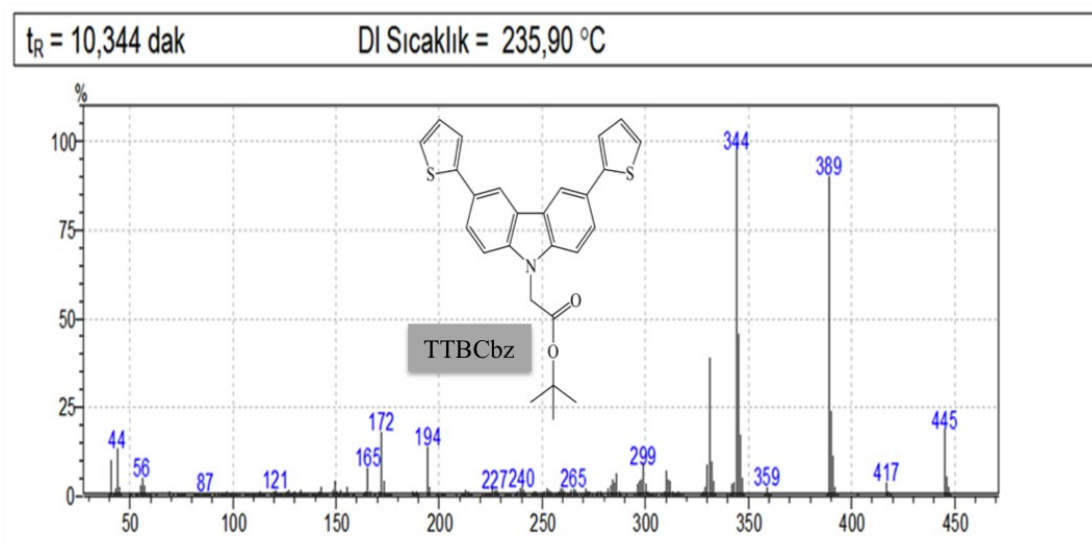

**Fig. S6** Mass spectrum of tert-butyl 2-(3,6-di(thien-2-yl)-9H-carbazol-9-yl)acetate (TTBCbz)



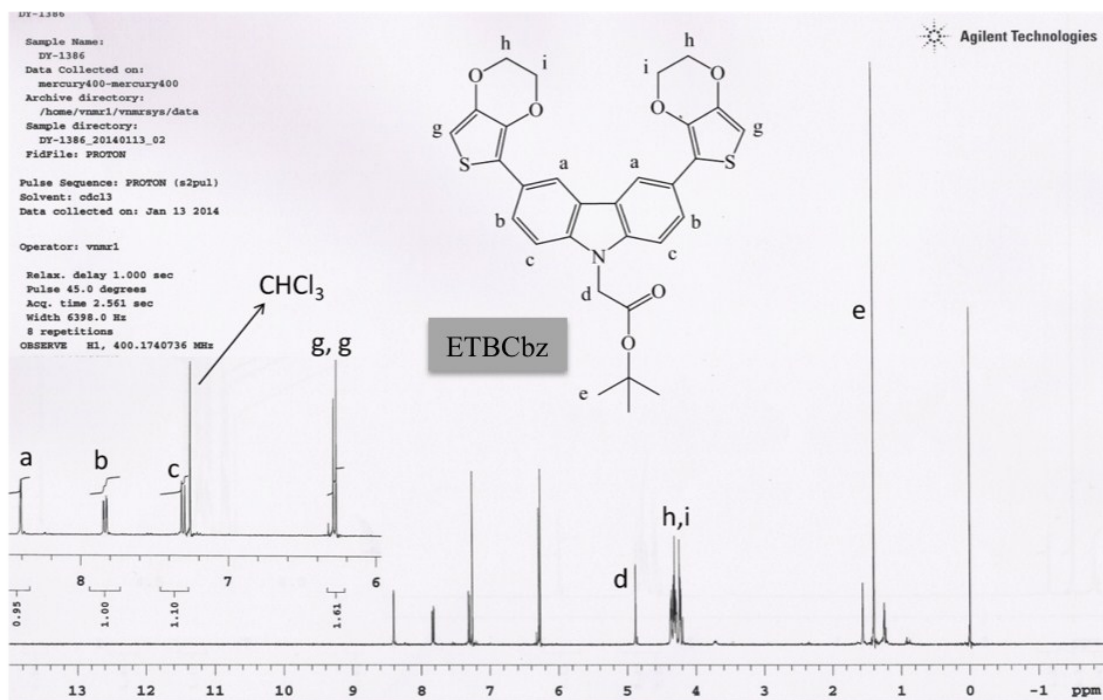

**Fig. S7** <sup>1</sup>H NMR spectrum of tert-butyl 2-(3,6-bis(2,3-dihydrothieno[3,4-b][1,4]dioxin-5-yl)-9H-carbazol-9-yl)acetate (ETBCbz)

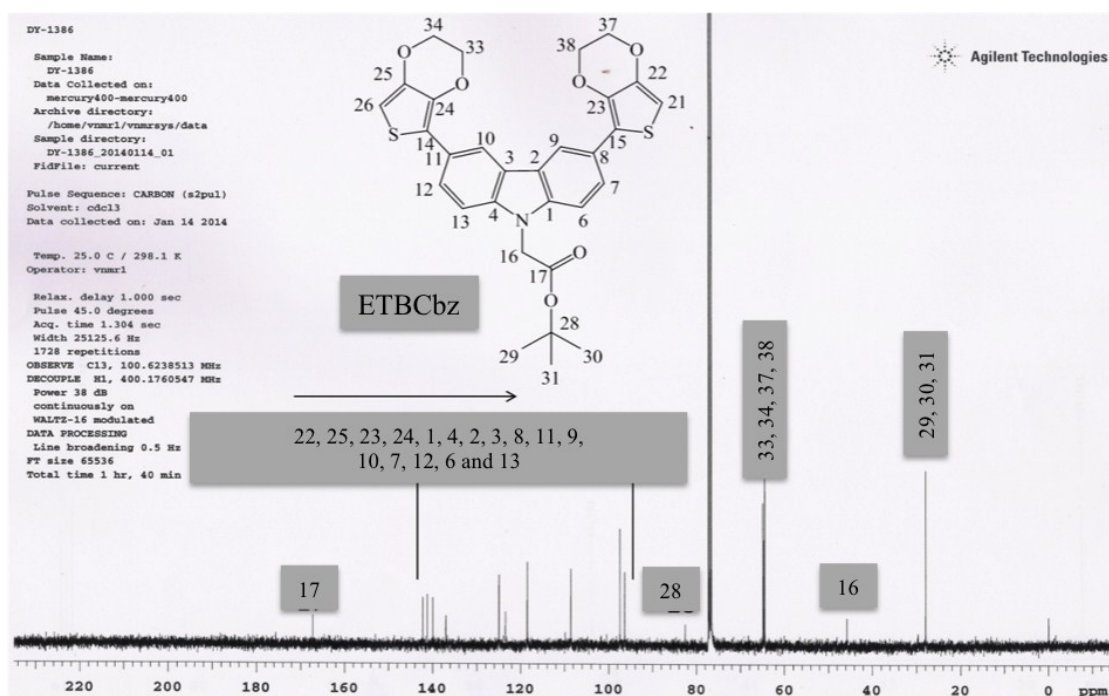

**Fig. S8** <sup>13</sup>C NMR spectrum of tert-butyl 2-(3,6-bis(2,3-dihydrothieno[3,4-b][1,4]dioxin-5-yl)-9H-carbazol-9-yl)acetate (ETBCbz)

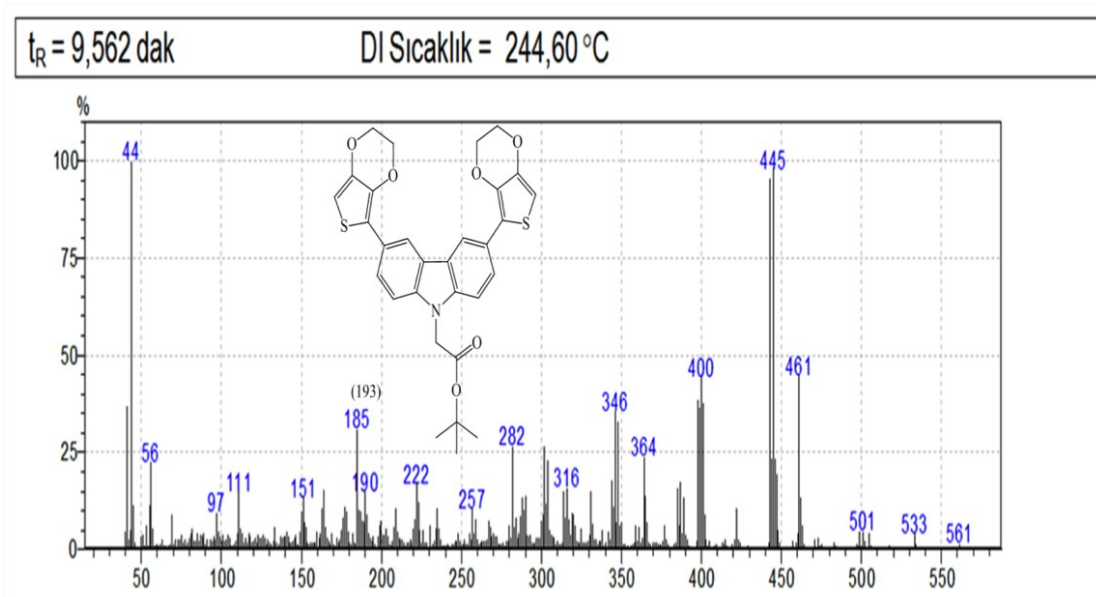

**Fig. S9** Mass spectrum of tert-butyl 2-(3,6-bis(2,3-dihydrothieno[3,4-b][1,4]dioxin-5-yl)-9H-carbazol-9-yl)acetate (ETBCbz)
